# Supplementary material
Source: publisher figshare collection journal article supplement (https://rs.figshare.com/ndownloader/files/14869520)
Supplement: Supplementary file 1 [file 14869520]

## Sheet: CandidateGenes
Entrez ID	Gene Name	Swissprot Gene	Swissprot Accession	Up or downregulated in sulfidic populations?
106921739	cldn5	CLD5	O00501	Upregulated
106921795	LOC106921795	PECA1	P16284	Upregulated
106921849	LOC106921849	TRI39	Q9HCM9	Upregulated
106921743	tmem45b	TM45B	Q96B21	Upregulated
106922343	antxr2	ANTR1	Q9H6X2	Upregulated
106922503	LOC106922503	COX5B	P10606	Upregulated
106922647	LOC106922647	CLD23	Q96B33	Upregulated
106923060	cdo1	CDO1	Q16878	Upregulated
106923145	N/A	N/A	N/A	Upregulated
106923425	dmxl2	DMXL2	Q8TDJ6	Upregulated
106923569	LOC106923569	CYC	P99999	Upregulated
106923581	LOC106923581	CYC	P99999	Upregulated
106923592	dmrta1	DMRTA	Q5VZB9	Upregulated
106923665	LOC106923665	RAB35	Q15286	Upregulated
106923902	mgat3	MGAT3	Q09327	Upregulated
106924214	ppargc1b	PRGC2	Q86YN6	Upregulated
106924366	egln3	EGLN3	Q9H6Z9	Upregulated
106924557	LOC106924557	CATD	P07339	Upregulated
106924576	LOC106924576	KCP3	Q53RY4	Upregulated
106924773	N/A	N/A	N/A	Upregulated
106924951	LOC106924951	K1C18	P05783	Upregulated
106924952	LOC106924952	K2C75	O95678	Upregulated
106925039	LOC106925039	TRXR3	Q86VQ6	Upregulated
106925041	LOC106925041	ITAV	P06756	Upregulated
106925210	lpcat4	LPCT4	Q643R3	Upregulated
106925740	maff	MAFK	O60675	Upregulated
106925983	LOC106925983	FCGBP	Q9Y6R7	Upregulated
106926034	LOC106926034	CLD5	O00501	Upregulated
106926165	N/A	N/A	N/A	Upregulated
106926268	LOC106926268	CLD19	Q8N6F1	Upregulated
106926447	LOC106926447	RDH16	O75452	Upregulated
106926567	plod1	PLOD2	O00469	Upregulated
106926602	LOC106926602	TXTP	P53007	Upregulated
106926858	LOC106926858	GIMA7	Q8NHV1	Upregulated
106926854	LOC106926854	GIMA7	Q8NHV1	Upregulated
106926861	mgst1	MGST1	P10620	Upregulated
106926981	pck1	PCKGM	Q16822	Upregulated
106927044	fdxr	ADRO	P22570	Upregulated
106927118	LOC106927118	SCO1	O75880	Upregulated
106927445	bmp10	BMP10	O95393	Upregulated
106927666	LOC106927666	SRC	P12931	Upregulated
106927885	pfkl	PFKAL	P17858	Upregulated
106928131	N/A	N/A	N/A	Upregulated
106928165	ctsz	CATZ	Q9UBR2	Upregulated
106928485	slc25a10	DIC	Q9UBX3	Upregulated
106928823	tmcc1	TMCC1	O94876	Upregulated
106929385	pmpcb	MPPB	O75439	Upregulated
106929368	slc26a5	S26A5	P58743	Upregulated
106929649	LOC106929649	PERE	P11678	Upregulated
106929740	LOC106929740	RBG10	B7ZAP0	Upregulated
106929737	LOC106929737	KEAP1	Q14145	Upregulated
106930004	mfn1	MFN1	Q8IWA4	Upregulated
106930026	LOC106930026	PRAF3	O75915	Upregulated
106930475	tstd1	TSTD1	Q8NFU3	Upregulated
106930099	LOC106930099	SURF1	Q15526	Upregulated
106930209	LOC106930209	AL3B1	P43353	Upregulated
106931148	N/A	N/A	N/A	Upregulated
106931160	LOC106931160	NOCT	Q9UK39	Upregulated
106931386	LOC106931386	PKHF1	Q96S99	Upregulated
106931615	mien1	MIEN1	Q9BRT3	Upregulated
106932573	ppp1r2	IPP2	P41236	Upregulated
106932089	slc45a4	S45A4	Q5BKX6	Upregulated
106932639	sqrdl	SQRD	Q9Y6N5	Upregulated
106933374	LOC106933374	MMP11	P24347	Upregulated
106932961	LOC106932961	MOT1	P53985	Upregulated
106933029	ppp1r3c	PPR3C	Q9UQK1	Upregulated
106934088	LOC106934088	EGLN2	Q96KS0	Upregulated
106933636	LOC106933636	COX42	Q96KJ9	Upregulated
106933837	rap1gap2	RPGP2	Q684P5	Upregulated
106903983	vta1	VTA1	Q9NP79	Upregulated
106904219	LOC106904219	COX15	Q7KZN9	Upregulated
106905422	LOC106905422	CAB39	Q9Y376	Upregulated
106905527	LOC106905527	ALDR	P15121	Upregulated
106904716	LOC106904716	DLX1	P56177	Upregulated
106904711	dlx3	DLX3	O60479	Upregulated
106905247	LOC106905247	F162A	Q96A26	Upregulated
106905253	LOC106905253	CYTB	P04080	Upregulated
106905278	LOC106905278	FHOD3	Q2V2M9	Upregulated
106905857	LOC106905857	NCAM1	P13591	Upregulated
106905987	LOC106905987	CATL2	O60911	Upregulated
106905985	LOC106905985	CATL1	P07711	Upregulated
106906103	inpp1	INPP	P49441	Upregulated
106906177	p4ha1	P4HA1	P13674	Upregulated
106906225	slc31a2	COPT2	O15432	Upregulated
106906414	N/A	N/A	N/A	Upregulated
106906592	acer1	ACER1	Q8TDN7	Upregulated
106906612	LOC106906612	UPP1	Q16831	Upregulated
106906808	LOC106906808	NCAN	O14594	Upregulated
106906896	LOC106906896	THTM	P25325	Upregulated
106906895	LOC106906895	THTM	P25325	Upregulated
106907080	LOC106907080	CAH2	P00918	Upregulated
106907638	LOC106907638	HBAZ	P02008	Upregulated
106908340	LOC106908340	RERGL	Q9H628	Upregulated
106908428	LOC106908428	THTM	P25325	Upregulated
106910582	LOC106910582	CLD6	P56747	Upregulated
106909565	LOC106909565	PCKGC	P35558	Upregulated
106909762	LOC106909762	TECTA	O75443	Upregulated
106909934	N/A	N/A	N/A	Upregulated
106910235	LOC106910235	HMDH	P04035	Upregulated
106910263	LOC106910263	S4A7	Q9Y6M7	Upregulated
106910597	LOC106910597	S4A7	Q9Y6M7	Upregulated
106911084	LOC106911084	POLS2	Q5K4E3	Upregulated
106911525	LOC106911525	ELOV6	Q9H5J4	Upregulated
106911536	LOC106911536	CRK	P46108	Upregulated
106913865	N/A	N/A	N/A	Upregulated
106913869	N/A	N/A	N/A	Upregulated
106912335	LOC106912335	CR3L4	Q8TEY5	Upregulated
106912572	LOC106912572	UROM	P07911	Upregulated
106912764	LOC106912764	FCGBP	Q9Y6R7	Upregulated
106912832	N/A	N/A	N/A	Upregulated
106913084	N/A	N/A	N/A	Upregulated
106914050	fam13c	RHG25	P42331	Upregulated
106914051	phyhipl	PHIPL	Q96FC7	Upregulated
106913386	LOC106913386	FCGBP	Q9Y6R7	Upregulated
106913422	LOC106913422	FCGBP	Q9Y6R7	Upregulated
106914116	LOC106914116	ANTR2	P58335	Upregulated
106914256	higd1a	HIG1A	Q9Y241	Upregulated
106914732	LOC106914732	G6PD	P11413	Upregulated
106914801	gclc	GSH1	P48506	Upregulated
106915353	LOC106915353	SIA7B	Q9UJ37	Upregulated
106915433	slc35g1	S35G1	Q2M3R5	Upregulated
106915720	pdk3	PDK3	Q15120	Upregulated
106916187	LOC106916187	AEDO	Q96SZ5	Upregulated
106916281	LOC106916281	ACO15	Q8N1Q8	Upregulated
106916567	LOC106916567	CLC4C	Q8WTT0	Upregulated
106917548	LOC106917548	MAFG	O15525	Upregulated
106917553	slc26a11	S2611	Q86WA9	Upregulated
106917691	LOC106917691	ETHE1	O95571	Upregulated
106917690	LOC106917690	ETHE1	O95571	Upregulated
106917689	LOC106917689	ETHE1	O95571	Upregulated
106917573	LOC106917573	GADL1	Q6ZQY3	Upregulated
106918085	efemp1	FBLN3	Q12805	Upregulated
106918524	LOC106918524	GSTM5	P46439	Upregulated
106918536	LOC106918536	ENOA	P06733	Upregulated
106918552	LOC106918552	ARAP2	Q8WZ64	Upregulated
106918827	LOC106918827	THIO	P10599	Upregulated
106918826	LOC106918826	THIO	P10599	Upregulated
106918876	gsr	GSHR	P00390	Upregulated
106919016	LOC106919016	PRDX1	Q06830	Upregulated
106919074	LOC106919074	UCP2	P55851	Upregulated
106919588	dnpep	DNPEP	Q9ULA0	Upregulated
106919787	LOC106919787	THTM	P25325	Upregulated
106920166	LOC106920166	BMP4	P12644	Upregulated
106919933	LOC106919933	TPIS	P60174	Upregulated
106920373	LOC106920373	CATK	P43235	Upregulated
106920760	LOC106920760	MYG	P02144	Upregulated
106921028	LOC106921028	NDRG1	Q92597	Upregulated
106921190	ak4	KAD4	P27144	Upregulated
106921307	LOC106921307	ARRD3	Q96B67	Upregulated
106921163	aldoc	ALDOC	P09972	Upregulated
106921616	LOC106921616	Q86XI6	PPR3B	Downregulated
106921799	LOC106921799	P20701	ITAL	Downregulated
106922682	LOC106922682	Q96GR2	ACBG1	Downregulated
106922789	LOC106922789	P16442	BGAT	Downregulated
106921309	LOC106921309	O14493	CLD4	Downregulated
106921524	LOC106921524	O14493	CLD4	Downregulated
106923233	LOC106923233	Q8IXH8	CAD26	Downregulated
106923308	gnl2	Q13823	NOG2	Downregulated
106924193	LOC106924193	Q7Z5J1	DHI1L	Downregulated
106924223	LOC106924223	Q9NRX3	NUA4L	Downregulated
106924259	depdc7	Q96QD5	DEPD7	Downregulated
106924675	LOC106924675	Q8WVX9	FACR1	Downregulated
106924777	LOC106924777	P08910	ABHD2	Downregulated
106924734	a3galt2	P16442	BGAT	Downregulated
106925171	LOC106925171	Q9GZV3	SC5A7	Downregulated
106925515	LOC106925515	P36269	GGT5	Downregulated
106925802	LOC106925802	O15466	SIA8E	Downregulated
106926011	LOC106926011	Q7RTR2	NLRC3	Downregulated
106926062	N/A	N/A	N/A	Downregulated
106926075	atp10d	O60312	AT10A	Downregulated
106926234	LOC106926234	P32246	CCR1	Downregulated
106926766	ghr	P10912	GHR	Downregulated
106926889	map3k5	Q99683	M3K5	Downregulated
106927240	LOC106927240	Q8WVX9	FACR1	Downregulated
106927225	map3k10	P80192	M3K9	Downregulated
106927266	mst1r	Q04912	RON	Downregulated
106927480	LOC106927480	Q9NSC7	SIA7A	Downregulated
106927490	arhgap20	Q9P2F6	RHG20	Downregulated
106927901	LOC106927901	Q5T8I3	F102B	Downregulated
106927900	LOC106927900	Q6NUK1	SCMC1	Downregulated
106927938	hapln3	P10915	HPLN1	Downregulated
106928242	LOC106928242	Q96CX2	KCD12	Downregulated
106928130	N/A	N/A	N/A	Downregulated
106928172	LOC106928172	P14222	PERF	Downregulated
106928742	LOC106928742	Q9Y5P4	C43BP	Downregulated
106928745	LOC106928745	Q16651	PRSS8	Downregulated
106928798	LOC106928798	Q7RTR2	NLRC3	Downregulated
106928791	LOC106928791	Q7RTR2	NLRC3	Downregulated
106928938	LOC106928938	Q86UD5	SL9B2	Downregulated
106929006	cers5	Q6ZMG9	CERS6	Downregulated
106929091	LOC106929091	O75604	UBP2	Downregulated
106929099	N/A	N/A	N/A	Downregulated
106929557	LOC106929557	Q9HBU6	EKI1	Downregulated
106929429	LOC106929429	P07384	CAN1	Downregulated
106929893	pdp1	Q9P0J1	PDP1	Downregulated
106930030	LOC106930030	P05186	PPBT	Downregulated
106930551	LOC106930551	O75604	UBP2	Downregulated
106930631	LOC106930631	Q16513	PKN2	Downregulated
106930862	LOC106930862	Q2QL34	MP17L	Downregulated
106931287	LOC106931287	P51692	STA5B	Downregulated
106931514	LOC106931514	Q99456	K1C12	Downregulated
106931525	LOC106931525	P08779	K1C16	Downregulated
106931528	LOC106931528	P05783	K1C18	Downregulated
106931526	LOC106931526	P08779	K1C16	Downregulated
106931609	slc44a4	Q53GD3	CTL4	Downregulated
106931653	LOC106931653	Q92874	DNSL2	Downregulated
106932034	fam46b	Q96IP4	FA46A	Downregulated
106932088	LOC106932088	Q8N1W1	ARG28	Downregulated
106932184	fam160a1	Q05DH4	F16A1	Downregulated
106932478	LOC106932478	Q9HCM9	TRI39	Downregulated
106933156	LOC106933156	Q9UL19	HRSL4	Downregulated
106932584	atp2b3	Q01814	AT2B2	Downregulated
106933274	slc25a25	Q6KCM7	SCMC2	Downregulated
106932765	prkcz	P41743	KPCI	Downregulated
106932817	fnbp1l	Q5T0N5	FBP1L	Downregulated
106933487	LOC106933487	P55017	S12A3	Downregulated
106933886	rnf152	Q8N8N0	RN152	Downregulated
106933983	LOC106933983	P02730	B3AT	Downregulated
106934023	LOC106934023	P21145	MAL	Downregulated
106934067	gsg1	Q6UXU4	GSG1L	Downregulated
106934068	emp1	P54851	EMP2	Downregulated
106934194	ada	P00813	ADA	Downregulated
106903257	LOC106903257	Q9NZW5	MPP6	Downregulated
106903265	clcn2	P51788	CLCN2	Downregulated
106903648	letm2	Q2VYF4	LETM2	Downregulated
106904764	LOC106904764	O43272	PROD	Downregulated
106904125	LOC106904125	Q9H6S3	ES8L2	Downregulated
106904194	LOC106904194	P10635	CP2D6	Downregulated
106904511	LOC106904511	Q99259	DCE1	Downregulated
106905054	LOC106905054	Q9NRX3	NUA4L	Downregulated
106905162	LOC106905162	O00370	LORF2	Downregulated
106905163	LOC106905163	P51788	CLCN2	Downregulated
106905179	N/A	N/A	N/A	Downregulated
106905402	LOC106905402	Q8IVY1	CA210	Downregulated
106905576	LOC106905576	O95678	K2C75	Downregulated
106906908	LOC106906908	Q15599	NHRF2	Downregulated
106905856	LOC106905856	Q06520	ST2A1	Downregulated
106906274	zdhhc16	Q969W1	ZDH16	Downregulated
106906570	LOC106906570	O43520	AT8B1	Downregulated
106907102	LOC106907102	Q8IZF5	AGRF3	Downregulated
106908521	LOC106908521	Q9NXI6	RN186	Downregulated
106907533	LOC106907533	Q7Z2Y8	GVIN1	Downregulated
106908073	LOC106908073	Q8IZF2	AGRF5	Downregulated
106908491	LOC106908491	Q9BVL4	SELO	Downregulated
106908578	LOC106908578	Q0D2K0	NIPA4	Downregulated
106909711	LOC106909711	Q9UBY9	HSPB7	Downregulated
106910093	LOC106910093	O43490	PROM1	Downregulated
106910224	LOC106910224	Q2M3D2	EX3L2	Downregulated
106911647	LOC106911647	P55017	S12A3	Downregulated
106912297	LOC106912297	P21980	TGM2	Downregulated
106912783	LOC106912783	P11142	HSP7C	Downregulated
106912818	LOC106912818	P11142	HSP7C	Downregulated
106913262	LOC106913262	P55017	S12A3	Downregulated
106914393	LOC106914393	P13647	K2C5	Downregulated
106914719	LOC106914719	O60825	F262	Downregulated
106914949	map3k15	Q6ZN16	M3K15	Downregulated
106915265	gadd45g	O95257	GA45G	Downregulated
106915212	ogdh	Q02218	ODO1	Downregulated
106915391	LOC106915391	Q9H4L5	OSBL3	Downregulated
106915440	LOC106915440	P05787	K2C8	Downregulated
106915608	LOC106915608	Q04695	K1C17	Downregulated
106915652	LOC106915652	Q9Y5Z4	HEBP2	Downregulated
106915732	LOC106915732	Q9BX67	JAM3	Downregulated
106915811	LOC106915811	Q8TF62	AT8B4	Downregulated
106916092	LOC106916092	Q92539	LPIN2	Downregulated
106916182	LOC106916182	P06213	INSR	Downregulated
106916411	LOC106916411	P20273	CD22	Downregulated
106916572	LOC106916572	Q684P5	RPGP2	Downregulated
106916617	LOC106916617	P51857	AK1D1	Downregulated
106916811	LOC106916811	P48443	RXRG	Downregulated
106917054	cs	O75390	CISY	Downregulated
106917797	LOC106917797	O94900	TOX	Downregulated
106918067	LOC106918067	Q9NSE2	CISH	Downregulated
106918422	LOC106918422	P05783	K1C18	Downregulated
106918435	LOC106918435	P35346	SSR5	Downregulated
106918505	ahcyl1	Q96HN2	SAHH3	Downregulated
106918590	LOC106918590	Q8WWL2	SPIR2	Downregulated
106918364	trpv4	Q9HBA0	TRPV4	Downregulated
106918697	LOC106918697	Q6UN15	FIP1	Downregulated
106918698	LOC106918698	P10721	KIT	Downregulated
106918900	LOC106918900	Q86VZ1	P2RY8	Downregulated
106918704	LOC106918704	Q16526	CRY1	Downregulated
106918988	LOC106918988	Q9NUV9	GIMA4	Downregulated
106919169	LOC106919169	P58107	EPIPL	Downregulated
106918986	LOC106918986	Q8N428	GLT16	Downregulated
106919244	N/A	N/A	N/A	Downregulated
106919243	N/A	N/A	N/A	Downregulated
106919344	LOC106919344	Q0VF96	CGNL1	Downregulated
106919519	LOC106919519	Q9Y6R1	S4A4	Downregulated
106919345	N/A	N/A	N/A	Downregulated
106919544	LOC106919544	Q12791	KCMA1	Downregulated
106919378	LOC106919378	Q7L804	RFIP2	Downregulated
106919865	LOC106919865	P24593	IBP5	Downregulated
106918443	LOC106918443	O95267	GRP1	Downregulated
106920499	LOC106920499	P04003	C4BPA	Downregulated
106920615	LOC106920615	Q9UBY9	HSPB7	Downregulated
106920613	fam131a	Q6UXB0	F131A	Downregulated
106920814	esrrg	P62508	ERR3	Downregulated
106921456	LOC106921456	Q9NY97	B3GN2	Downregulated
